# Supplementary material for: Universal Ready-to-Use Immunotherapeutic Approach for the Treatment of Cancer: Expanded and Activated Polyclonal γδ Memory T Cells
Source: PubMed Central journal article supplement (PMC6883509; doi:10.3389/fimmu.2019.02717), 2019-11-22

A

| DNA-System | K562 wt  | $\gamma\delta$ 1-T_T0 | $\gamma\delta$ 1-T_T28 | $\gamma\delta$ 2-T_T0 | $\gamma\delta$ 2-T_T28 | $\gamma\delta$ 3-T_T0 | $\gamma\delta$ 3-T_T28 | $\gamma\delta$ 4-T_T0 | $\gamma\delta$ 4-T_T28 |
|------------|----------|-----------------------|------------------------|-----------------------|------------------------|-----------------------|------------------------|-----------------------|------------------------|
| AM         | X, X     | X, X                  | X, X                   | X, Y                  | X, Y                   | X, Y                  | X, Y                   | X, Y                  | X, Y                   |
| D6S1043    | 11, 15   | 11, 11                | 11, 11                 | 12, 13                | 12, 13                 | 12, 12                | 12, 12                 | 13, 13                | 13, 13                 |
| Penta E    | 5, 14    | 10, 11                | 10, 11                 | 7, 11                 | 7, 11                  | 11, 17                | 11, 17                 | 7, 13                 | 7, 13                  |
| D16S539    | 11, 12   | 12, 13                | 12, 13                 | 9, 9                  | 9, 9                   | 9, 12                 | 9, 12                  | 11, 13                | 11, 13                 |
| D18S51     | 15, 16   | 13, 17                | 13, 17                 | 12, 20                | 12, 20                 | 17, 18                | 17, 18                 | 15, 18                | 15, 18                 |
| Penta D    | 9, 13    | 11, 13                | 11, 13                 | 7, 14                 | 7, 14                  | 10, 13                | 10, 13                 | 13, 14                | 13, 14                 |
| D21S11     | 29, 31   | 30, 31.2              | 30, 31.2               | 26, 32.2              | 26, 32.2               | 29, 30                | 29, 30                 | 31.2, 32.2            | 31.2, 32.2             |
| D7S820     | 9, 11    | 10, 11                | 10, 11                 | 9, 12                 | 9, 12                  | 9, 10                 | 9, 10                  | 9, 10                 | 9, 10                  |
| D19S433    | 14, 14.2 | 13, 14.2              | 13, 14.2               | 13, 14                | 13, 14                 | 14, 16                | 14, 16                 | 13, 14                | 13, 14                 |

B

K562  $\gamma\delta$ \_aAPC CD40L/pp65 CNT

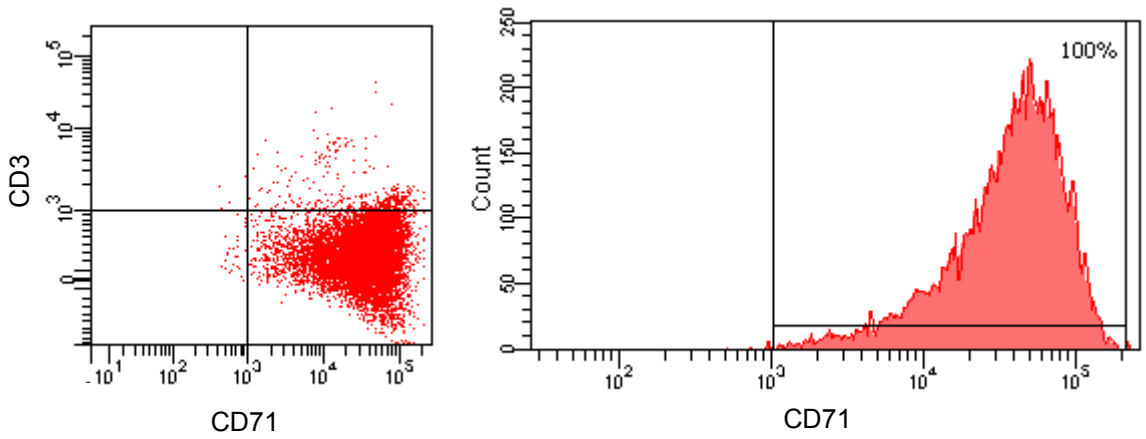

Expanded  $\gamma\delta$ \_aAPC CD40L/pp65

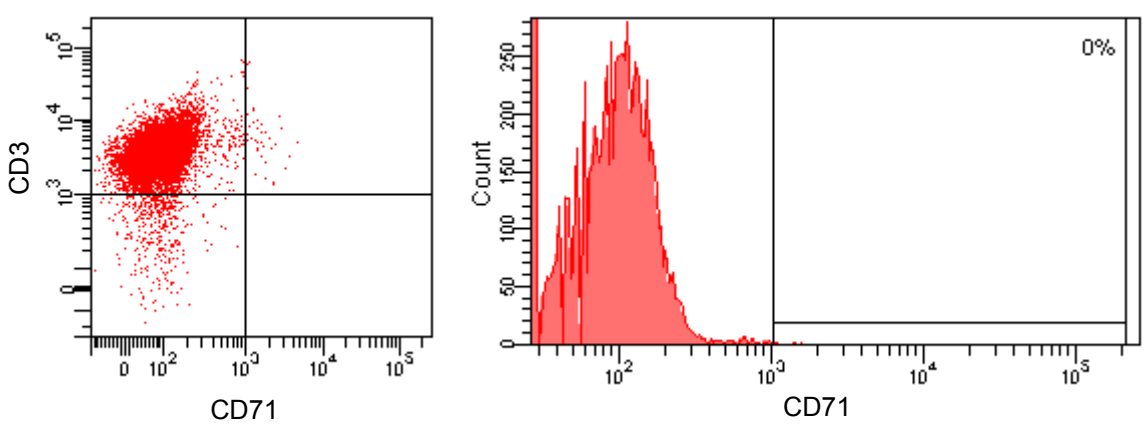

Supplement: Image_7.pdf [file Image_7.pdf]
