# Supplementary material for: Universal Ready-to-Use Immunotherapeutic Approach for the Treatment of Cancer: Expanded and Activated Polyclonal γδ Memory T Cells
Source: PubMed Central journal article supplement (PMC6883509; doi:10.3389/fimmu.2019.02717), 2019-11-22

**A**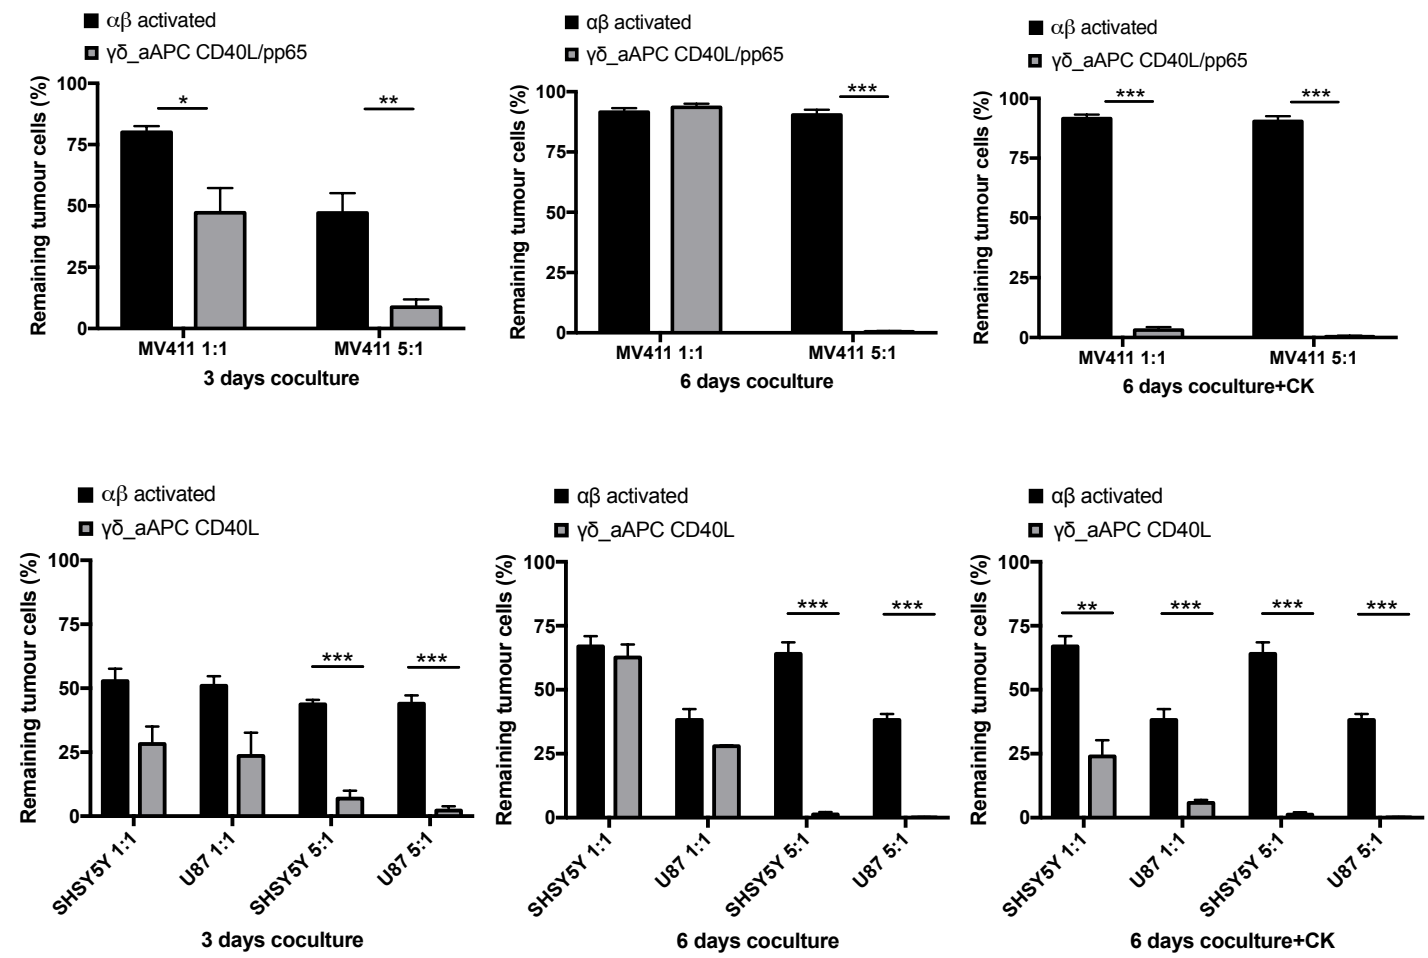**B**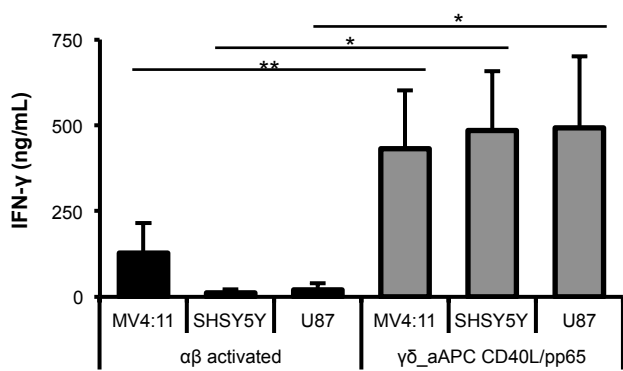**C**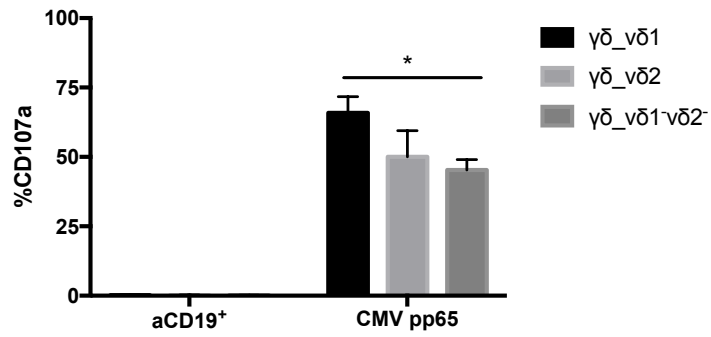**D**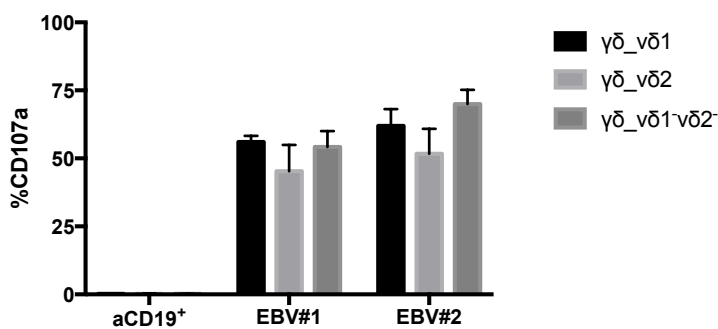**E**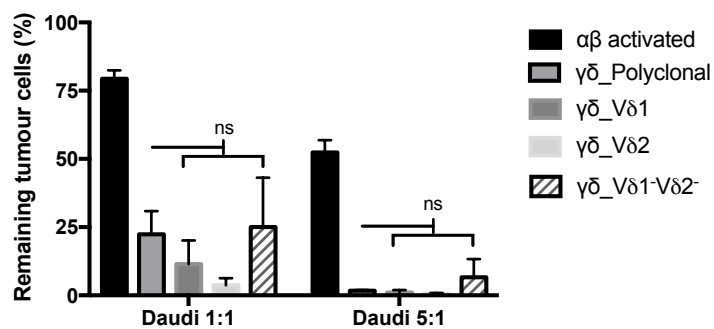

Supplement: Image_4.pdf [file Image_4.pdf]
