# Supplementary material for: Universal Ready-to-Use Immunotherapeutic Approach for the Treatment of Cancer: Expanded and Activated Polyclonal γδ Memory T Cells
Source: PubMed Central journal article supplement (PMC6883509; doi:10.3389/fimmu.2019.02717), 2019-11-22
Supplement: Image_6.pdf [file Image_6.pdf]

A

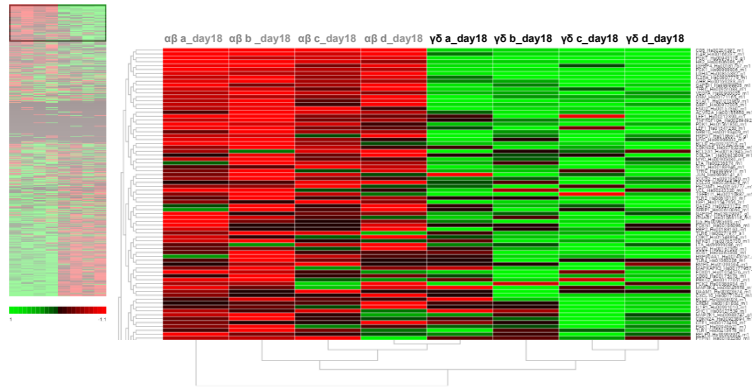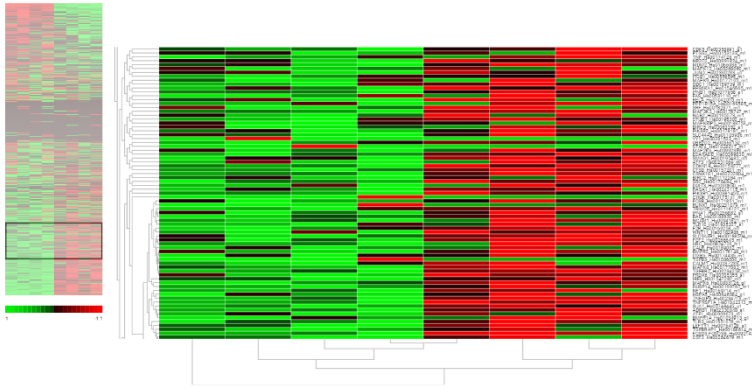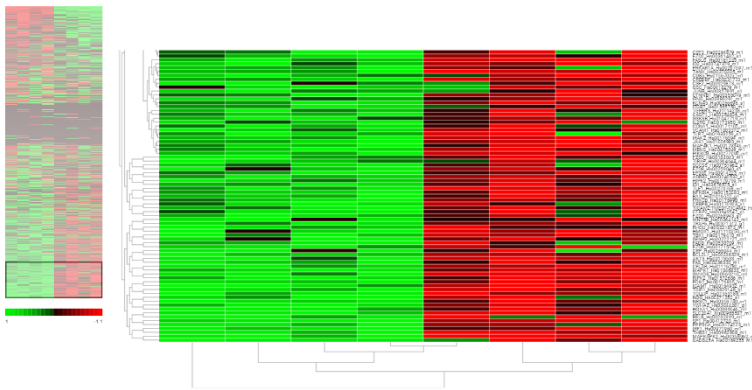

| Modulated Pathways                     |
|----------------------------------------|
| Immune System                          |
| Metabolism of Proteins                 |
| Programmed Cell Death                  |
| Gene Expression (Transcription)        |
| Extracellular Matrix Organisation      |
| Signal Transduction                    |
| Disease                                |
| Cellular Responses to External Stimuli |
| Hemostasis                             |
| Metabolism                             |

B

| Down-Regulated |        |        |       |          |
|----------------|--------|--------|-------|----------|
| ALOX5          | FLT3LG | IFNGR2 | LIF   | RPLP0    |
| CCL25          | GPI    | IGFBP4 | LTA   | STAT1    |
| CCR4           | GRB10  | IL1A   | LTA4H | TNFSF13B |
| CCR7           | GRN    | IL2RA  | LY86  | TRAP1    |
| CD4            | HDAC4  | IL4R   | NFRKB | VEGFA    |
| CD5            | HK2    | IL6R   | NLRP3 | VEGFB    |
| CFP            | HSPD1  | IL7R   | OSM   |          |
| CXCR4          | ICOSLG | LDHA   | PGK1  |          |

| Up-Regulated |        |         |        |       |
|--------------|--------|---------|--------|-------|
| ABCB1        | CMKLR1 | ICAM1   | IL18RA | TGIF1 |
| CCR9         | CX3CR1 | IL12A   | IL2RB  | THBS1 |
| CD86         | HMOX1  | IL12RB2 | RIPK2  | XCR1  |
| CFLAR        |        |         |        |       |
