# Supplementary material for: Universal Ready-to-Use Immunotherapeutic Approach for the Treatment of Cancer: Expanded and Activated Polyclonal γδ Memory T Cells
Source: PubMed Central journal article supplement (PMC6883509; doi:10.3389/fimmu.2019.02717), 2019-11-22

A

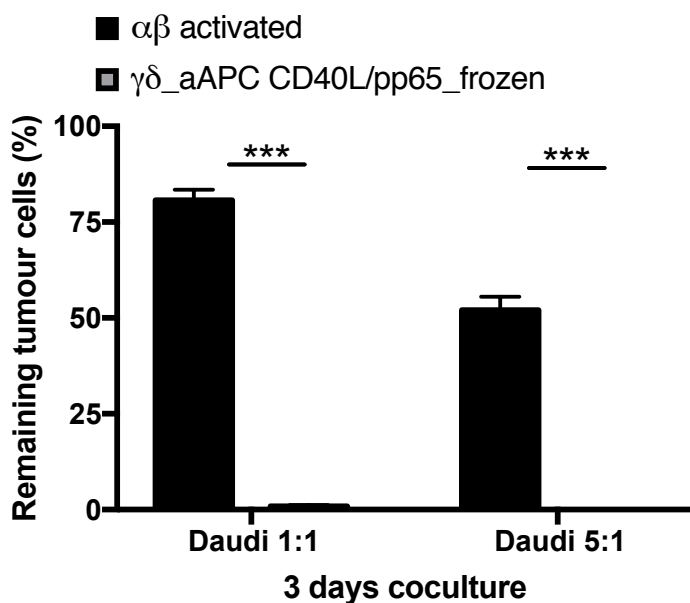

B

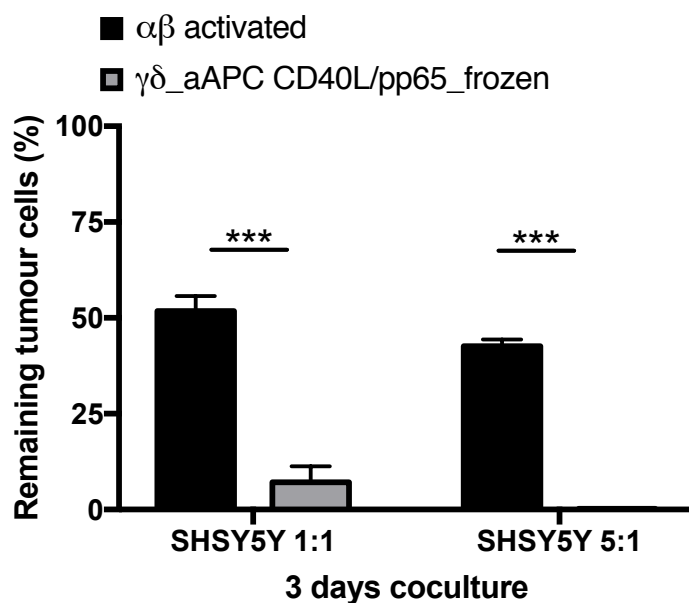

C

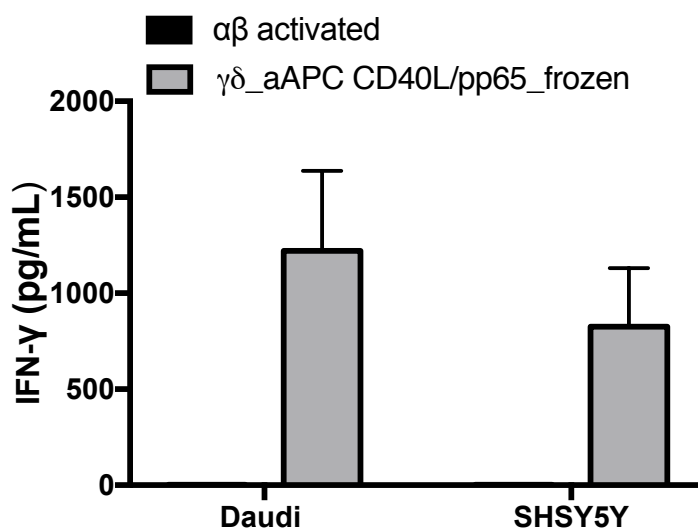

Supplement: Image_8.pdf [file Image_8.pdf]
